# Supplementary material
Source: Springer Nature journal article supplement (https://www.springermedizin.de/resource/supplementary/12936_2008_691_MOESM1_ESM.pdf/9548010)

(%)

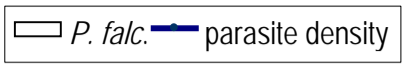

parasites/ul

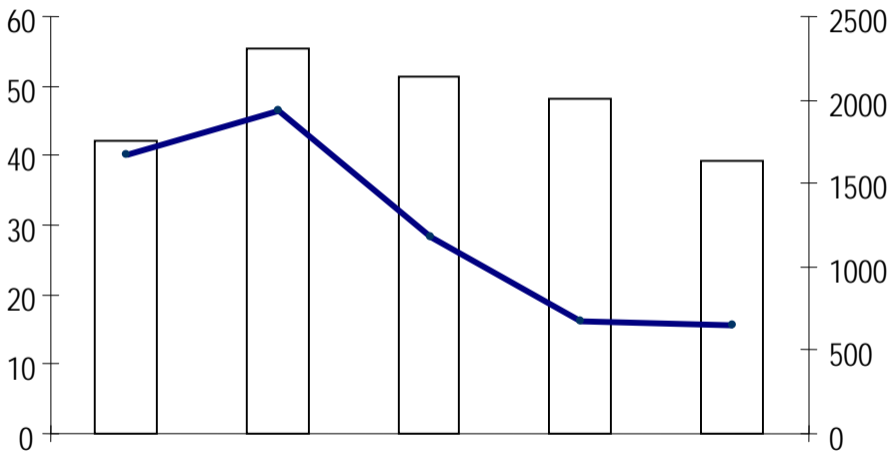

<12      12-23m      24-59m      5-<7y      7-<10

age group

Supplement: MOESM1 [file 9548010]
